# Supplementary material for: Pannexin 2 Localizes at ER-Mitochondria Contact Sites
Source: PubMed Central journal article supplement (PMC6468579; doi:10.3390/cancers11030343), 2019-03-11
Supplement: cancers-11-00343-s001.pdf [file cancers-11-00343-s001.pdf]

# Pannexin 2 Localizes at ER-Mitochondria Contact Sites

Maxence Le Vasseur, Vincent C. Chen, Kate Huang, Wayne A. Vogl and Christian C. Naus

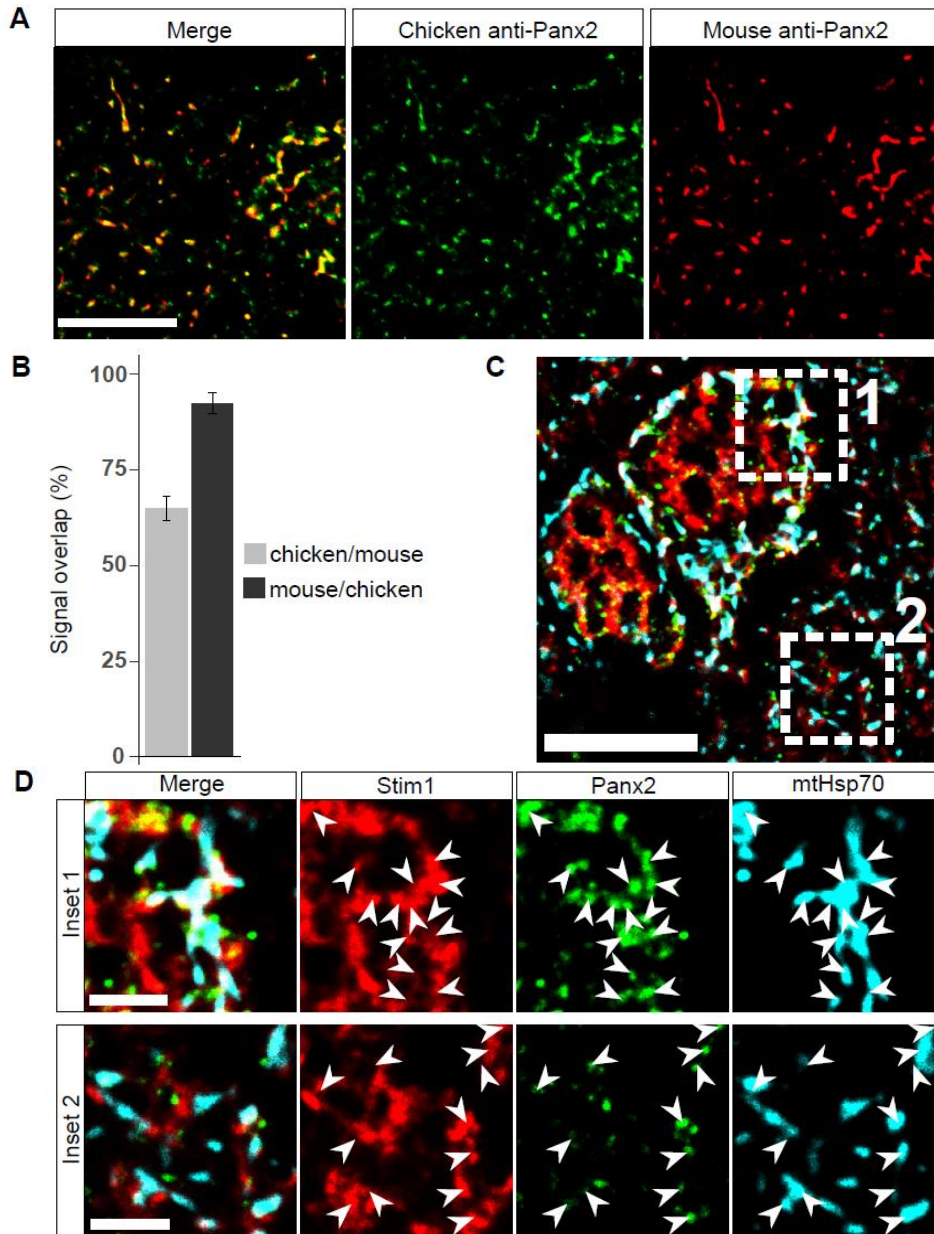

**Figure S1.** Anti-Panx2 antibodies from different species show that Panx2 localizes at ER-mitochondria contact sites. (A) Mouse brain sections immunoprobed for Panx2 using a chicken polyclonal antibody from (Diatheva, green) and a mouse monoclonal antibody (NeuroMab, red) showed overlapping staining patterns. Scale bar: 10  $\mu$ m. (B)  $64.8 \pm 3.2$  % of the staining obtained with the chicken anti-Panx2 antibody overlapped with the staining from the mouse primary antibody while  $92.3 \pm 2.7$  % of the staining from the mouse antibody overlapped with the staining from the chicken antibody ( $n = 4$ ). (C) Mouse brain sections were immunoprobed for Panx2 using the chicken anti-Panx2 antibody (green) and for Stim1 (red) and mtHsp70 (cyan) to label the ER and mitochondria respectively. Scale bar: 10  $\mu$ m. (D) Magnification of the insets from C showing that several Panx2 punctae localize at ER-mitochondria contact sites (arrowheads). Scale bars: 2.5  $\mu$ m.

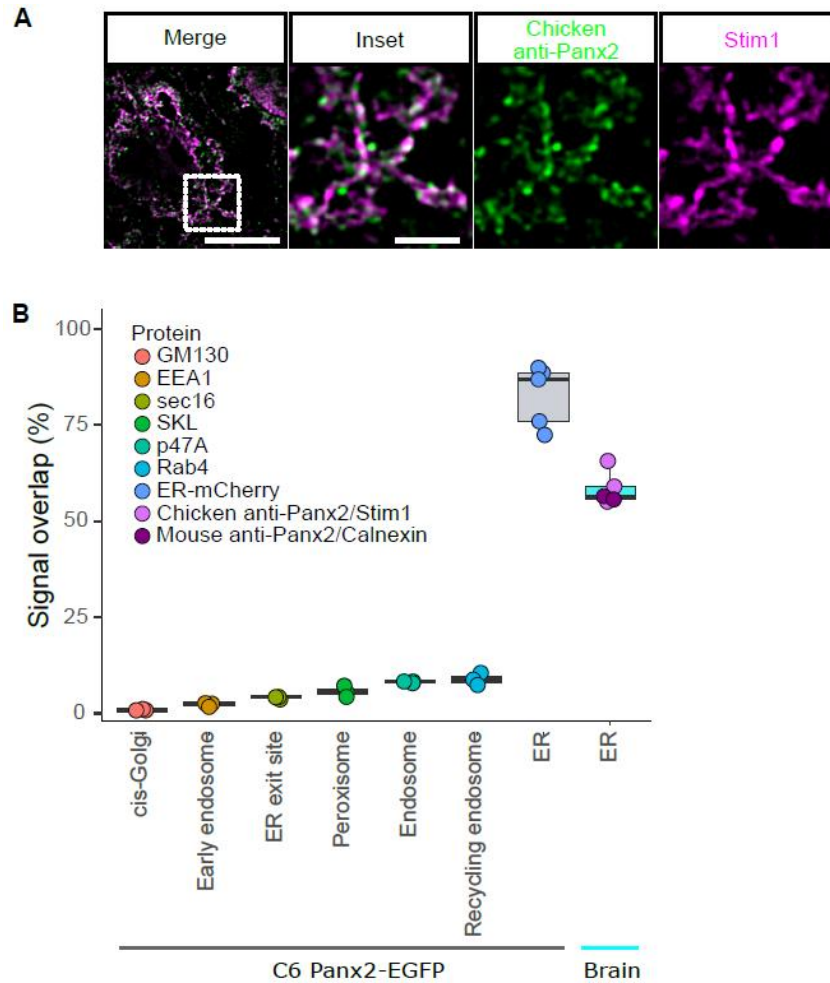

**Figure S2.** Panx2 co-localizes with ER markers. **(A)** Representative image of a brain section stained with a chicken anti-Panx2 antibody and an antibody against the ER protein Stim1. Endogenous Panx2 co-localized substantially with the ER marker. Scale bars: 10  $\mu$ m and 2.5  $\mu$ m (inset). **(B)** Co-localization between Panx2 and various organelle markers was calculated using the Manders' coefficients (expressed in percentage). A minimal coefficient value of 0 corresponds to non-overlapping images while a maximal value of 100% represents perfect overlap between both images. The low coefficient values (<10%) indicate poor co-localization between Panx2 and the secretory and endocytic organelle markers. In contrast, Panx2 co-localized strongly with ER markers in C6 Panx2-EGFP cells ( $82.78 \pm 3.56\%$ ) or in brain sections ( $58.4 \pm 1.94\%$ ).

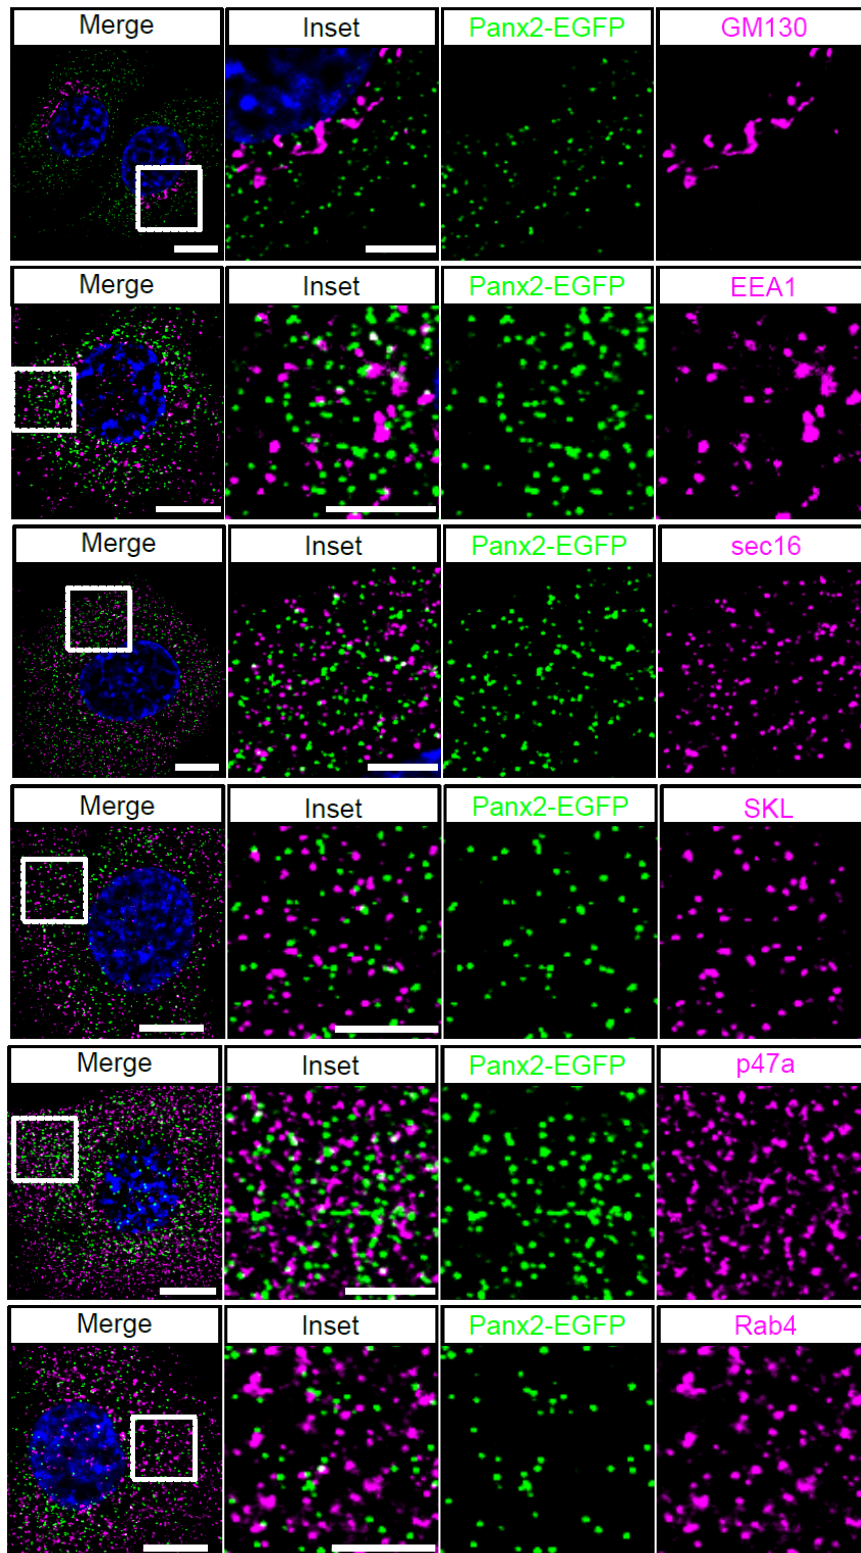

**Figure S3.** Panx2 signal does not co-localize with endosomal markers. Panx2-EGFP signal did not co-localize with secretory and endocytic organelle markers. The absence of co-localization with sec16 indicates that over-expressing Panx2-EGFP does not trap Panx2 at ER exit sites. Scale bars: 10  $\mu\text{m}$  and 5  $\mu\text{m}$  (insets).
